# Supplementary material for: Profiling of Secondary Metabolites of Optimized Ripe Ajwa Date Pulp (Phoenix dactylifera L.) Using Response Surface Methodology and Artificial Neural Network
Source: MDPI journal article supplement (doi:10.3390/ph16020319), 2023-02-20
Supplement: s1 [file s1]

Table S1: Central composite design (CCD) for the independent variables and corresponding response value in RSM and ANN (predicted)

| Run | Independent variables |                   |                   | Responses (predicted) |      |                   |      |                   |       |                   |      |
|-----|-----------------------|-------------------|-------------------|-----------------------|------|-------------------|------|-------------------|-------|-------------------|------|
|     | (X <sub>1</sub> )     | (X <sub>2</sub> ) | (X <sub>3</sub> ) | (Y <sub>1</sub> )     |      | (Y <sub>2</sub> ) |      | (Y <sub>3</sub> ) |       | (Y <sub>4</sub> ) |      |
|     |                       |                   |                   | RSM                   | ANN  | RSM               | ANN  | RSM               | ANN   | RSM               | ANN  |
| 1   | 75                    | 4                 | 70                | 4.30                  | 4.41 | 3.16              | 3.19 | 10.81             | 10.77 | 1.38              | 1.24 |
| 2   | 25                    | 2                 | 50                | 3.81                  | 3.59 | 2.55              | 2.65 | 10.25             | 10.24 | 1.47              | 1.42 |
| 3   | 75                    | 2                 | 50                | 3.90                  | 4.11 | 2.55              | 2.58 | 9.75              | 9.72  | 1.16              | 0.98 |
| 4   | 100                   | 3                 | 60                | 4.30                  | 4.27 | 3.44              | 3.11 | 10.11             | 10.73 | 1.12              | 0.96 |
| 5   | 75                    | 2                 | 70                | 3.50                  | 3.49 | 2.56              | 2.49 | 9.95              | 9.95  | 1.17              | 1.45 |
| 6   | 50                    | 3                 | 60                | 4.53                  | 4.34 | 3.10              | 2.97 | 10.45             | 10.36 | 1.40              | 1.37 |
| 7   | 0                     | 3                 | 60                | 3.00                  | 3.09 | 2.52              | 2.96 | 9.57              | 9.79  | 0.91              | 0.96 |
| 8   | 75                    | 4                 | 50                | 4.31                  | 3.08 | 2.95              | 3.32 | 9.88              | 9.9   | 0.88              | 0.88 |
| 9   | 50                    | 3                 | 60                | 4.30                  | 4.34 | 3.15              | 2.97 | 10.40             | 10.36 | 1.46              | 1.37 |
| 10  | 50                    | 3                 | 60                | 4.51                  | 4.34 | 3.09              | 2.97 | 10.42             | 10.36 | 1.43              | 1.37 |
| 11  | 50                    | 3                 | 80                | 3.78                  | 3.78 | 2.26              | 2.40 | 9.50              | 9.59  | 1.10              | 1.09 |
| 12  | 50                    | 3                 | 60                | 4.46                  | 4.34 | 3.01              | 2.97 | 10.48             | 10.36 | 1.45              | 1.37 |
| 13  | 50                    | 3                 | 60                | 4.48                  | 4.34 | 3.12              | 2.97 | 10.41             | 10.36 | 1.43              | 1.37 |
| 14  | 25                    | 4                 | 70                | 3.15                  | 3.15 | 2.16              | 2.19 | 9.60              | 9.62  | 1.00              | 1.10 |
| 15  | 50                    | 3                 | 60                | 4.51                  | 4.34 | 2.95              | 2.97 | 10.2              | 10.36 | 1.45              | 1.37 |
| 16  | 50                    | 3                 | 40                | 3.85                  | 3.83 | 2.48              | 2.45 | 9.60              | 9.89  | 0.92              | 0.93 |
| 17  | 25                    | 2                 | 70                | 3.25                  | 3.21 | 2.15              | 2.16 | 9.36              | 9.4   | 1.12              | 1.29 |
| 18  | 50                    | 1                 | 60                | 2.87                  | 3.14 | 2.03              | 2.13 | 9.80              | 9.64  | 1.32              | 1.36 |
| 19  | 50                    | 5                 | 60                | 2.90                  | 2.98 | 2.50              | 2.49 | 9.90              | 9.8   | 0.86              | 0.85 |
| 20  | 25                    | 4                 | 50                | 2.96                  | 2.95 | 2.38              | 2.17 | 9.53              | 9.6   | 0.75              | 0.74 |

X<sub>1</sub>: Ethanol concentration (%); X<sub>2</sub>: time (h); X<sub>3</sub>: temperature (°C); (Y<sub>1</sub>): total phenolic content (mgGAE/g) (TPC); (Y<sub>2</sub>): total flavonoid content (mgCAE/g) (TFC); (Y<sub>3</sub>): DPPH-radical scavenging activity (% inhibition); (Y<sub>4</sub>): cupric reducing antioxidant capacity (μM ascorbic acid equivalent) (CUPRAC).

Table S2: Independent process variables with experimental ranges and levels for heat reflux extraction of ripe Ajwa dates pulp (RADP).

| Input variables              | Variable range and levels (coded) |                |    |    |    |    |     |
|------------------------------|-----------------------------------|----------------|----|----|----|----|-----|
|                              | unit                              | Code           | -α | -1 | 0  | +1 | +α  |
| Ethanol concentration (EtOH) | %                                 | X <sub>1</sub> | 0  | 25 | 50 | 75 | 100 |
| Time                         | h                                 | X <sub>2</sub> | 1  | 2  | 3  | 4  | 5   |
| Temperature                  | °C                                | X <sub>3</sub> | 40 | 50 | 60 | 70 | 80  |

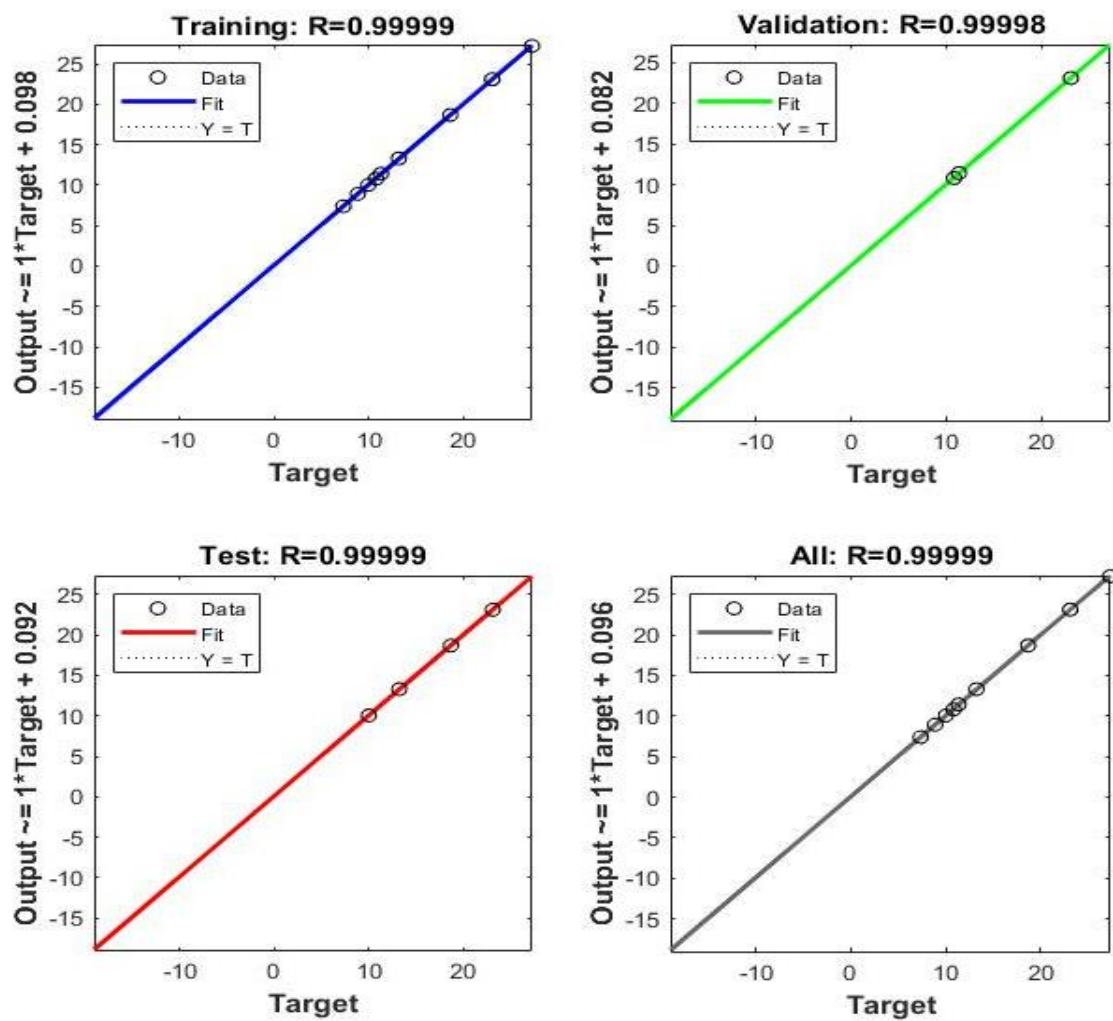

Figure S1: The  $R^2$  value of training, validation, test and overall for TPC during ANN.

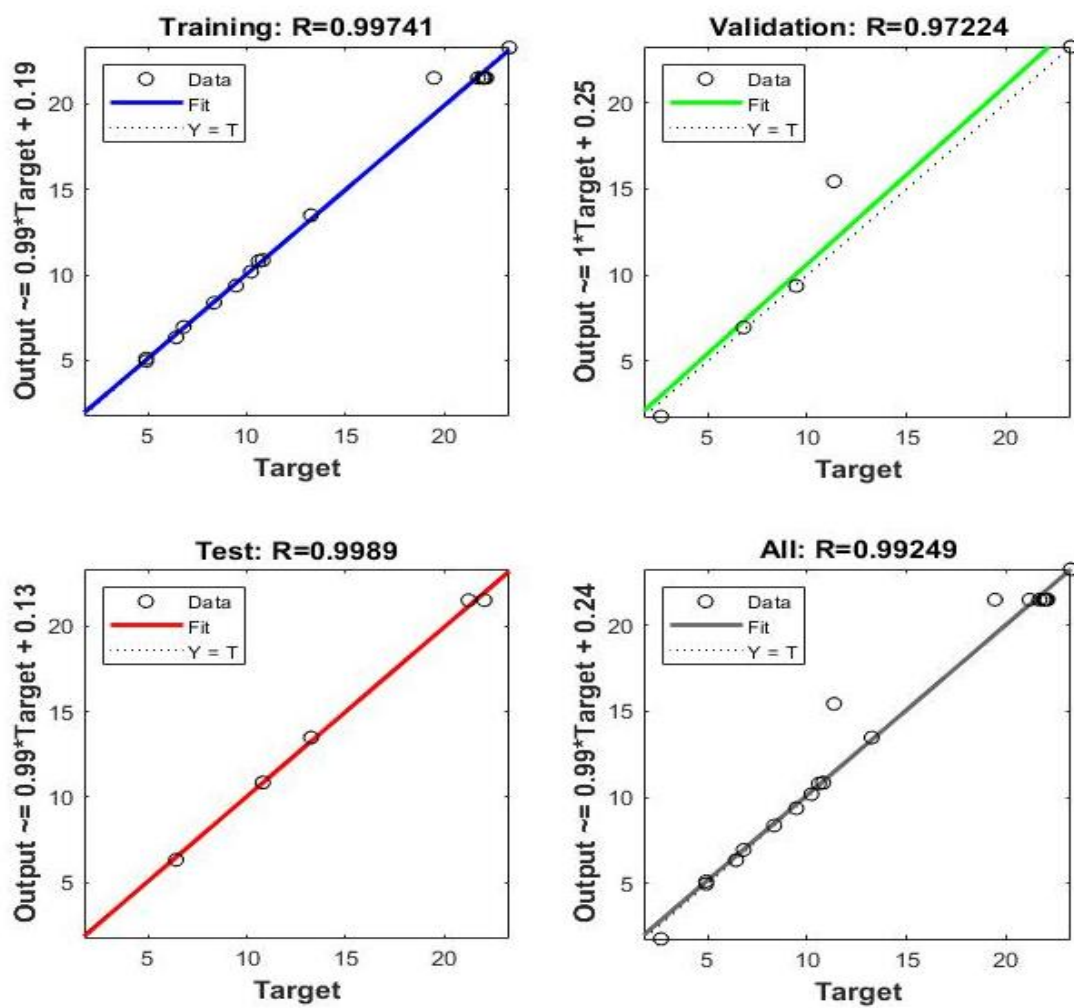

Figure S2: The  $R^2$  value of training, validation, test and overall for TFC during ANN.

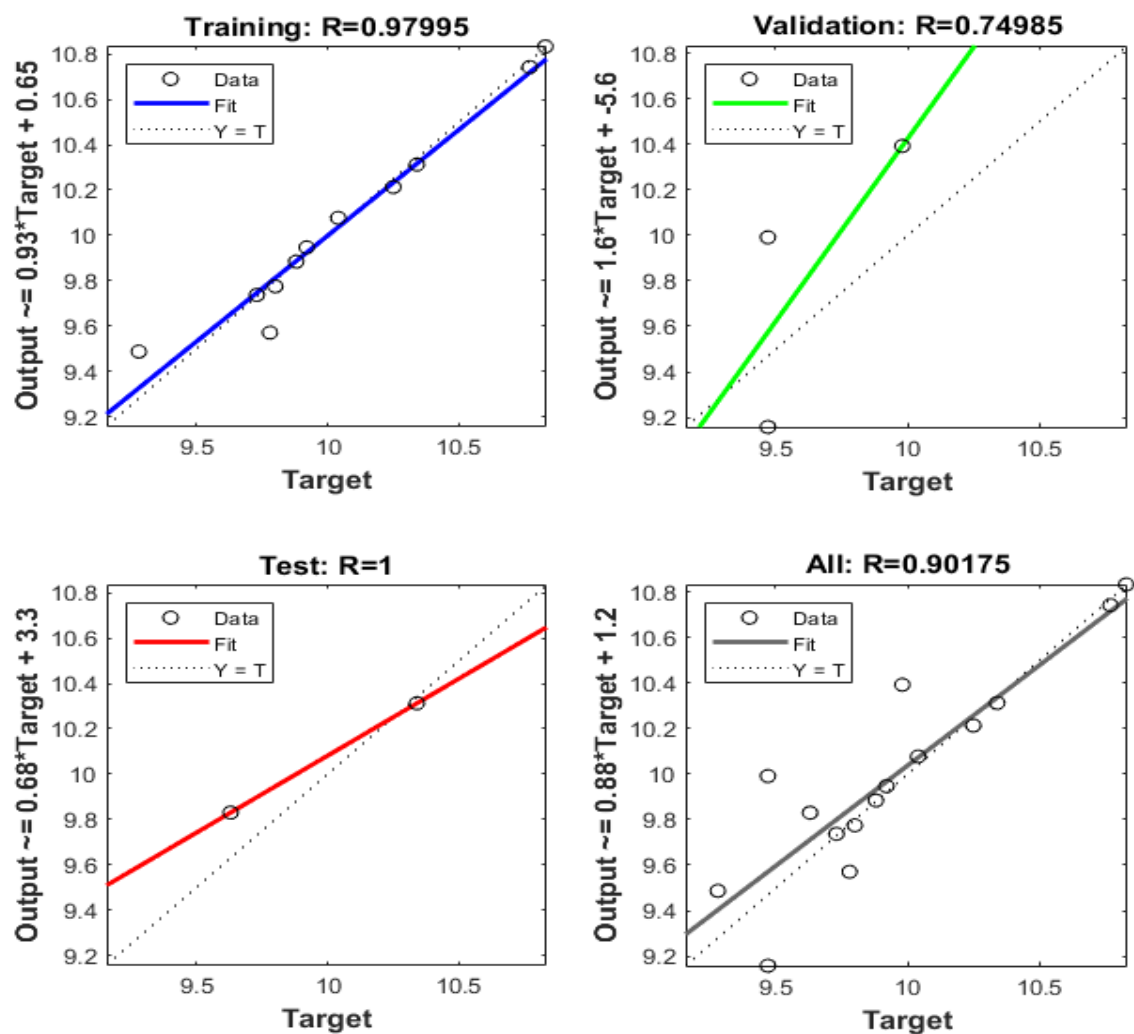

Figure S3: The  $R^2$  value of training, validation, test and overall for DPPH during ANN.

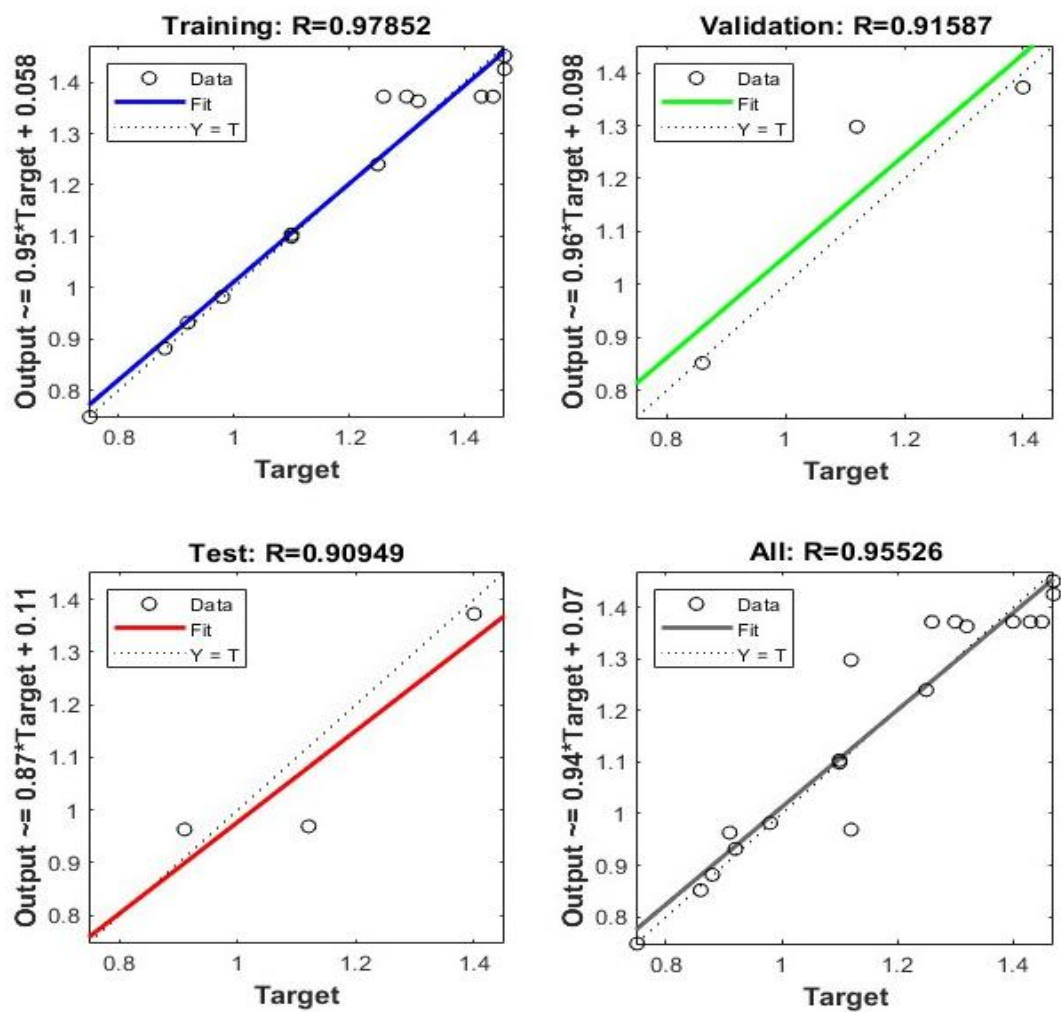

Figure S4: The  $R^2$  value of training, validation, test and overall for CUPRAC during ANN.

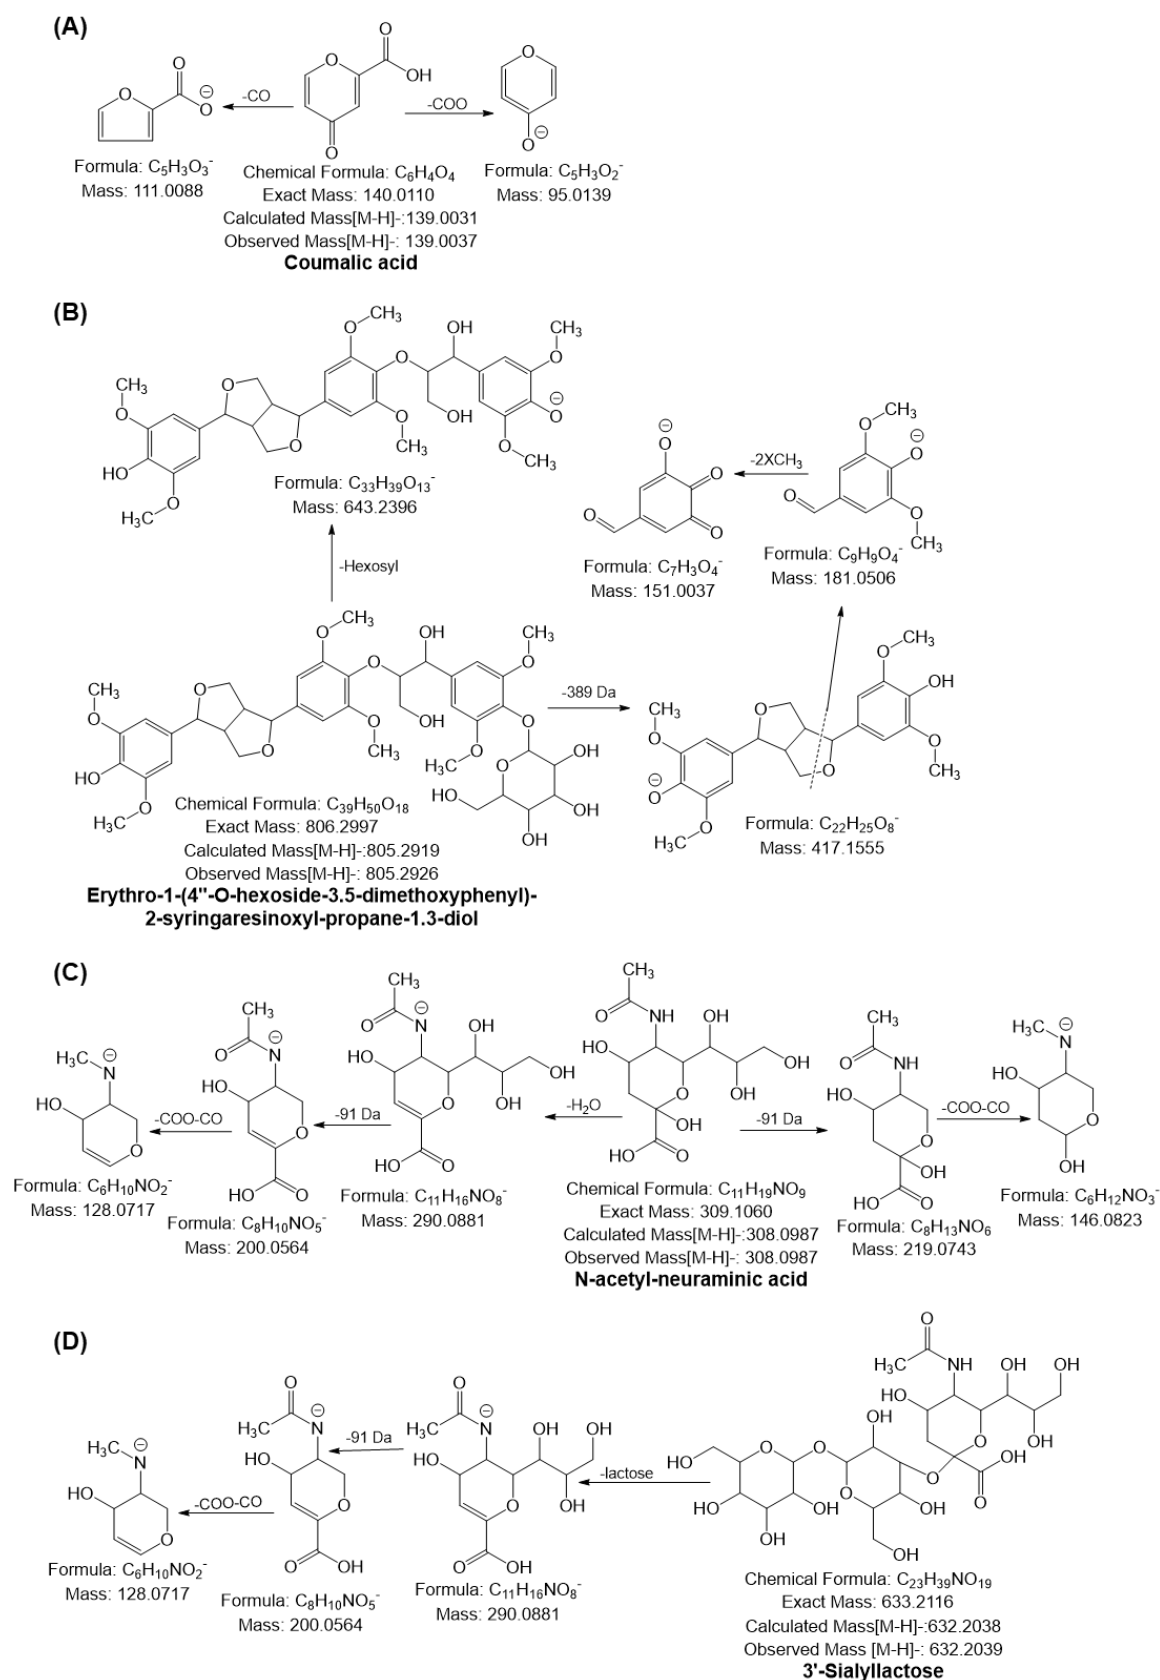

Figure S5: Possible mass fragmentation behaviour of identified compounds in RADP. (A) coumalic acid, (B) Erythro-1-(4''-O-β-D-glucopyranoside-3,5-dimethoxyphenyl)-2-syringaresinoxyl-propane-1,3-diol, (C) N-acetyl-α-neuraminic acid, and (D) 6'-sialyllactose.

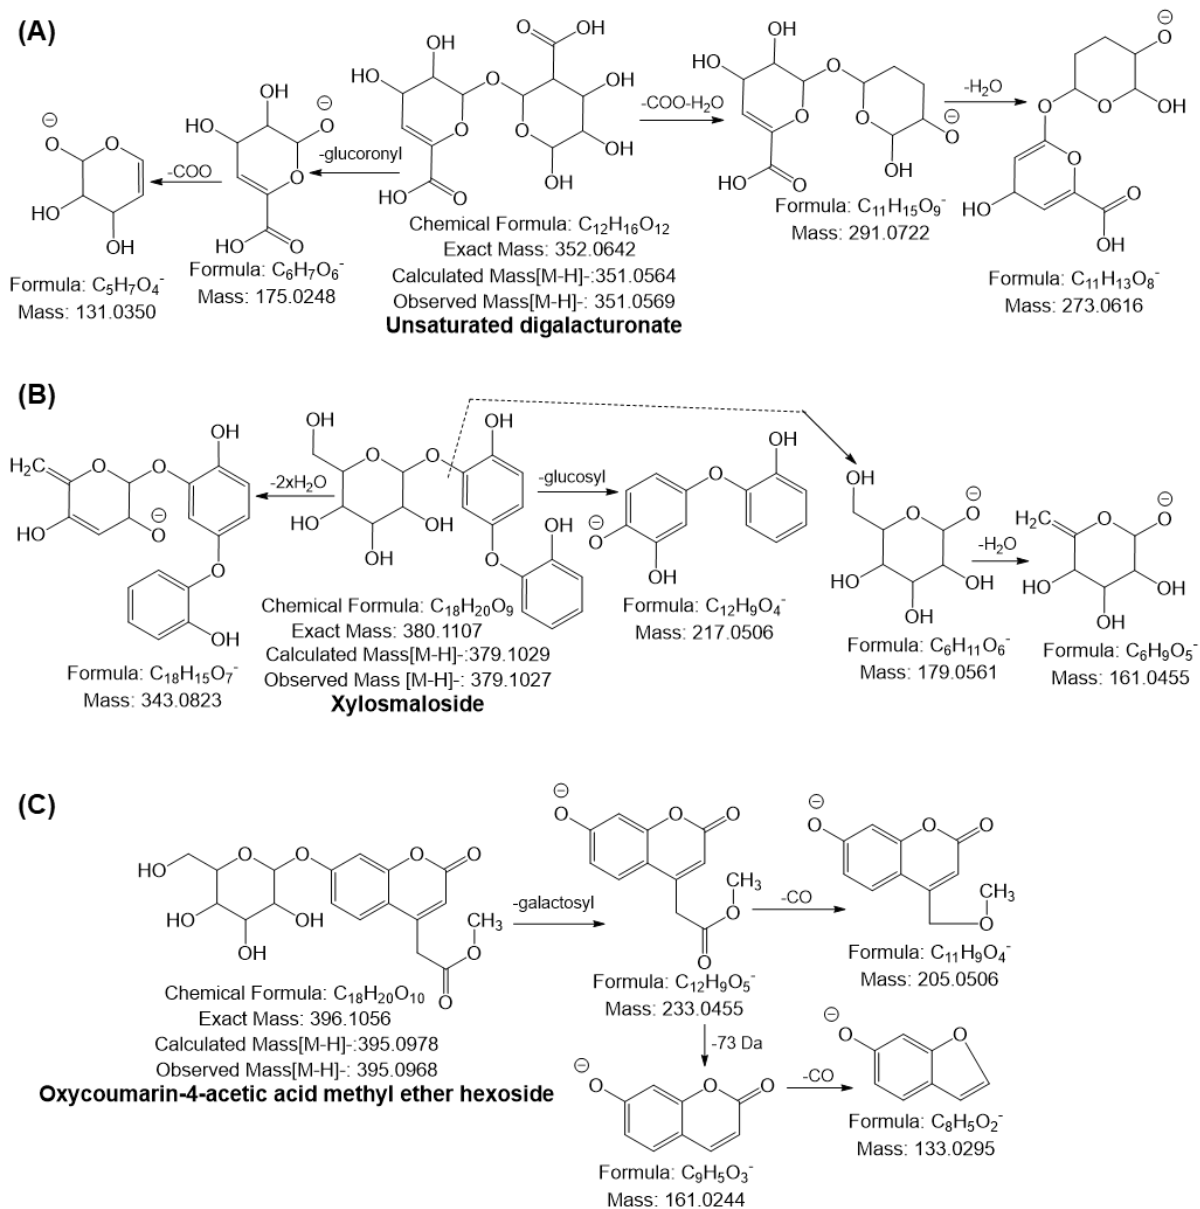

Figure S6: Possible mass fragmentation behaviour of identified compounds in RADP. (A) Unsaturated digalacturonate, (B) Xylosmaloside and (C) Oxycoumarin-4-acetic acid methyl ester hexoside.
